# Supplementary material
Source: PubMed Central journal article supplement (PMC3397428)

## Supporting Information

### **Novel tricyclic indeno[2, 1-*d*]pyrimidines with dual antiangiogenic and cytotoxic activities as potent antitumor agents**

Aleem Gangjee,<sup>\*,†</sup> Ying Zhao,<sup>†</sup> Michael A. Ihnat,<sup>‡</sup> Jessica E. Thorpe,<sup>‡</sup> Lora C. Bailey-Downs,<sup>‡</sup>  
Roy L. Kisliuk<sup>§</sup>

<sup>†</sup>Division of Medicinal Chemistry, Graduate School of Pharmaceutical Sciences, Duquesne University, 600 Forbes Avenue, Pittsburgh, Pennsylvania 15282

<sup>‡</sup>Department of Cell Biology, School of Medicine, University of Oklahoma Health Sciences Center, Oklahoma City, Oklahoma 73104

<sup>§</sup> Department of Biochemistry, School of Medicine, Tufts University, Boston, Massachusetts 02111

Elemental Analysis  
High-Resolution Mass spectra (HRMS) (EI)  
UPLC/UV/ELSD/MS method and data

### Elemental analysis

| #         | Formula                                                                 | Calcd (%) |      |       |       |       |       | Found % |      |       |       |       |       |
|-----------|-------------------------------------------------------------------------|-----------|------|-------|-------|-------|-------|---------|------|-------|-------|-------|-------|
|           |                                                                         | C         | H    | N     | F     | Cl    | Br    | C       | H    | N     | F     | Cl    | Br    |
| <b>5</b>  | C <sub>17</sub> H <sub>13</sub> FN <sub>4</sub> ·0.4H <sub>2</sub> O    | 68.17     | 4.64 | 18.71 | 6.34  |       |       | 68.36   | 4.47 | 18.42 | 6.40  |       |       |
| <b>7</b>  | C <sub>17</sub> H <sub>13</sub> ClN <sub>4</sub>                        | 66.13     | 4.24 | 18.15 | 11.48 |       |       | 66.15   | 4.26 | 18.07 |       | 11.56 |       |
| <b>9</b>  | C <sub>17</sub> H <sub>13</sub> BrN <sub>4</sub> ·0.6CH <sub>3</sub> OH | 56.76     | 4.17 | 15.04 |       |       | 21.45 | 56.95   | 3.93 | 15.16 |       |       | 21.21 |
| <b>10</b> | C <sub>18</sub> H <sub>13</sub> F <sub>3</sub> N <sub>4</sub>           | 63.16     | 3.83 | 16.37 | 16.65 |       |       | 62.78   | 3.81 | 16.21 | 16.51 |       |       |
| <b>13</b> | C <sub>17</sub> H <sub>12</sub> ClFN <sub>4</sub>                       | 62.49     | 3.70 | 17.15 | 5.81  | 10.85 |       | 62.24   | 3.76 | 16.98 | 5.65  | 10.66 |       |
| <b>16</b> | C <sub>11</sub> H <sub>9</sub> N <sub>3</sub> O·0.1H <sub>2</sub> O     | 65.73     | 4.61 | 20.94 |       |       |       | 65.76   | 4.50 | 21.13 |       |       |       |

### High-Resolution mass spectra (HRMS) (EI)

| #         | Formula                                                         | Calcd mass | Found mass |
|-----------|-----------------------------------------------------------------|------------|------------|
| <b>1</b>  | C <sub>17</sub> H <sub>14</sub> N <sub>4</sub>                  | 274.1218   | 274.1218   |
| <b>2</b>  | C <sub>20</sub> H <sub>21</sub> N <sub>4</sub>                  | 317.1766   | 317.1751   |
| <b>3</b>  | C <sub>20</sub> H <sub>20</sub> N <sub>4</sub>                  | 316.1688   | 316.1704   |
| <b>4</b>  | C <sub>17</sub> H <sub>13</sub> FN <sub>4</sub>                 | 292.1124   | 292.1123   |
| <b>6</b>  | C <sub>17</sub> H <sub>13</sub> ClN <sub>4</sub>                | 308.0829   | 308.0838   |
| <b>8</b>  | C <sub>17</sub> H <sub>14</sub> BrN <sub>4</sub>                | 353.0402   | 353.0387   |
| <b>11</b> | C <sub>18</sub> H <sub>16</sub> N <sub>4</sub> O                | 304.1324   | 304.1390   |
| <b>12</b> | C <sub>17</sub> H <sub>12</sub> ClFN <sub>4</sub>               | 326.0735   | 326.0744   |
| <b>17</b> | C <sub>17</sub> H <sub>13</sub> N <sub>4</sub> O <sub>5</sub> S | 385.0607   | 385.0584   |

**UPLC/UV/ELSD/MS System.** Optical LC-MS grade acetonitrile was purchased from Fisher (), and formic acid was obtained from Sigma-Aldrich (St. Louis, MO). Milli-Q water as an ultrapure laboratory grade water was used in aqueous mobile phase.

Chromatographic separation was performed on an Acquity UPLC BEH C18 1.7  $\mu\text{m}$ , 2.1 x 50 mm column (Waters Corporation, Milford, MA) using an Acquity ultra performance liquid chromatography system. Data were acquired using Masslynx v. 4.1 and analyzed using the Openlynx software suite. This was coupled to an Acquity photodiode array detector, which acquired UV data from 210-400 nm. The flow was then split, with half directed to an evaporative light scattering detector (ELSD) and half to an SQ mass spectrometer. The total flow rate was 1.0 mL/min. The sample injection volume was 2  $\mu\text{L}$ . The UPLC column was maintained at 55  $^{\circ}\text{C}$  and the gradient program started at 90% A (0.1% formic acid in MilliQ H<sub>2</sub>O), changed to 70% A over 0.2 min, to 95 % B (0.1% formic acid in Acetonitrile) over 1.4 minutes, held for 0.35 minutes, then to 90% A over 0.05 minutes. The mass spectrometer was operated in positive-ion mode with electrospray ionization. The conditions were as follows: capillary voltage 3.4 kV, cone voltage 30 V, source temperature 130  $^{\circ}\text{C}$ , desolvation temperature 350  $^{\circ}\text{C}$ , desolvation gas 650 L/hr, cone gas 46 L/hr. A full scan range from  $m/z = 100-1000$  in 0.2 s was used to acquire MS data. The ELSD-drift tube temperature was set at 50  $^{\circ}\text{C}$ .

All compounds' average UV and ELSD purity is more than 95%.<sup>1</sup>

1. Lemoff, A.; Yan, B. Dual Detection Approach to a More Accurate Measure of Relative Purity in High-Throughput Characterization of Compound Collections. *J. Comb. Chem.* **2008**, *10*, 746-751.

### Figure 1: Compound 1 HPLC/MS/ELSD analysis data

Sample Report (continued):

Sample 6 Vial 2:H,4 ID File YZHAO\_070711\_04 Date 07-Jul-2011 Time 14:07:31 Description

2: UV Detector: TIC (1) ELSD Signal (1) 35.510  
 Range: 2.954e+2 100% Range: 35.547

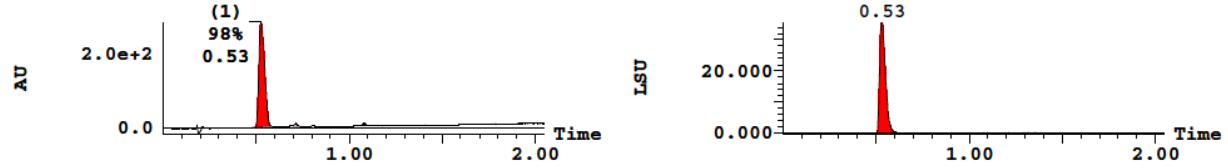

| Peak ID | Compound | Time | Mass Found |
|---------|----------|------|------------|
| 1       |          | 0.53 |            |

1:(Time: 0.53) Combine (573)

2:UV Detector  
3.537 AU

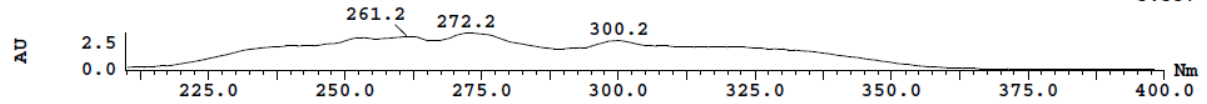

| Peak ID | Compound | Time | Mass Found |
|---------|----------|------|------------|
| 1       |          | 0.53 |            |

1:MS ES+  
8.8e+007

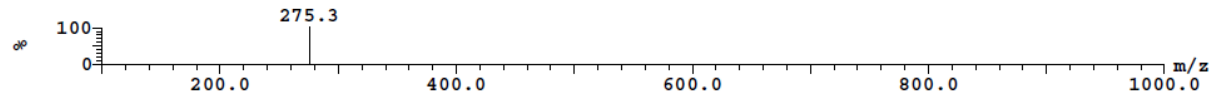

### Figure 2: Compound 2 HPLC/MS/ELSD analysis data

Sample Report:

Sample 3 Vial 2:H,1 ID File YZHAO\_070711\_01\_2 Date 07-Jul-2011 Time 14:27:06 Description

2: UV Detector: TIC (1) ELSD Signal (1) 24.538  
 Range: 2.177e+2 100% Range: 24.599

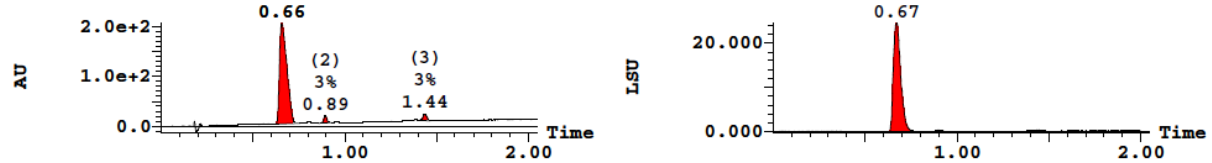

| Peak ID | Compound | Time | Mass Found |
|---------|----------|------|------------|
| 1       |          | 0.66 |            |

1:(Time: 0.66) Combine (730)

2:UV Detector  
3.361 AU

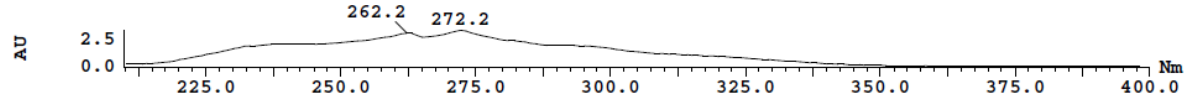

| Peak ID | Compound | Time | Mass Found |
|---------|----------|------|------------|
| 1       |          | 0.66 |            |

1:MS ES+  
1.1e+008

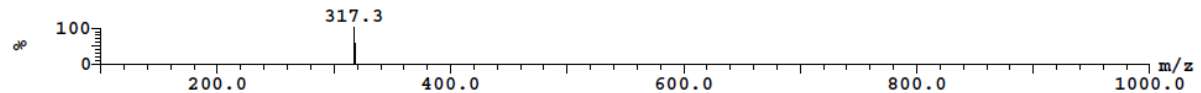

### Figure 3: Compound 3 HPLC/MS/ELSD analysis data

Sample 4 Vial 2:H,2 ID File YZHAO\_070711\_02 Date 07-Jul-2011 Time 14:01:58 Description

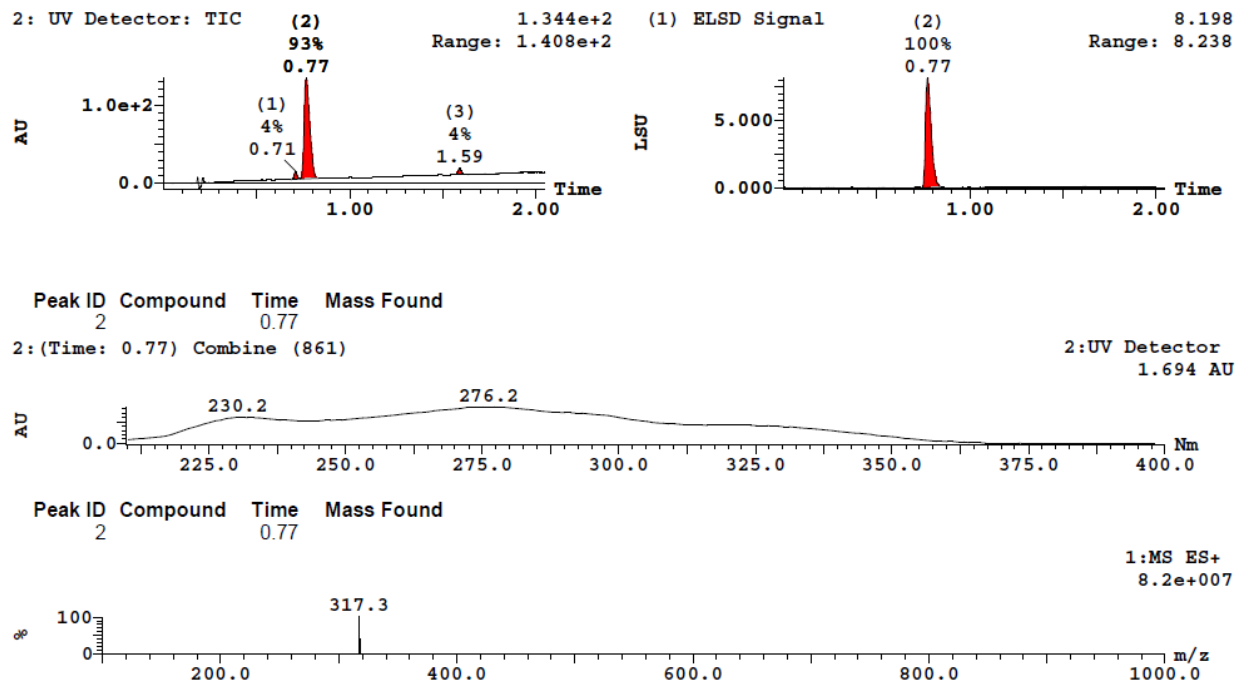

### Figure 4: Compound 4 HPLC/MS/ELSD analysis data

Sample Report (continued):

Sample 10 Vial 2:H,12 ID File YZHAO\_070711\_08\_1 Date 07-Jul-2011 Time 14:44:44 Description

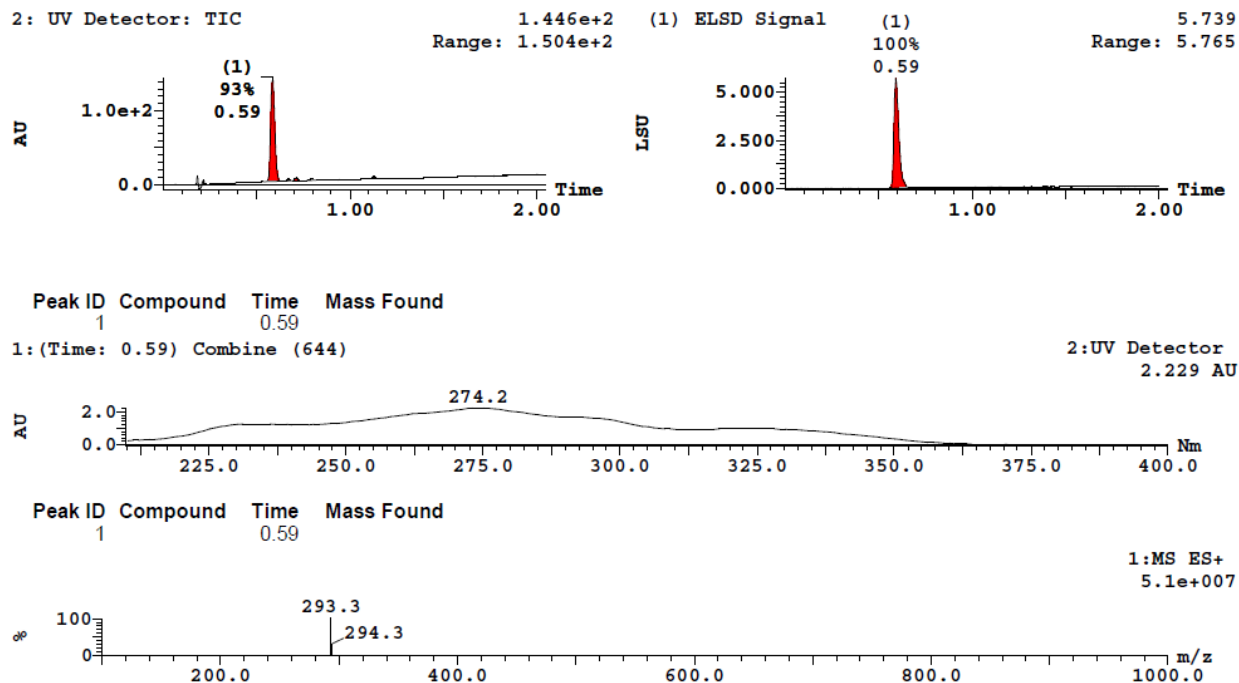

### Figure 5: Compound 6 HPLC/MS/ELSD analysis data

Sample Report (continued):

Sample 9 Vial 2:H,7 ID File YZHAO\_070711\_07 Date 07-Jul-2011 Time 14:15:49 Description

2: UV Detector: TIC (1) 2.096e+2 (1) ELSD Signal (1) 13.585  
 Range: 2.224e+2 Range: 13.615

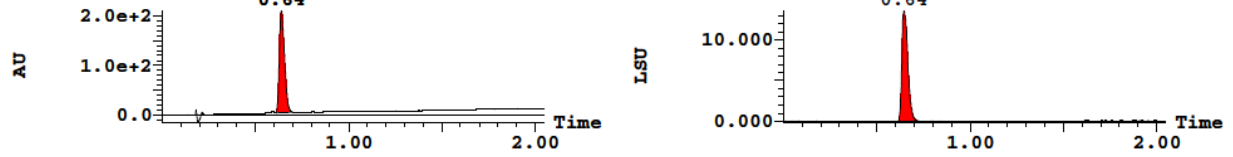

| Peak ID | Compound | Time | Mass Found |
|---------|----------|------|------------|
| 1       |          | 0.64 |            |

1: (Time: 0.64) Combine (708)

2:UV Detector  
3.152 AU

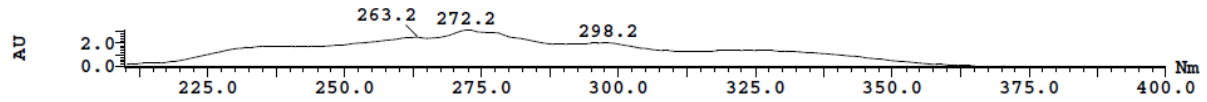

| Peak ID | Compound | Time | Mass Found |
|---------|----------|------|------------|
| 1       |          | 0.64 |            |

1:MS ES+  
6.9e+007

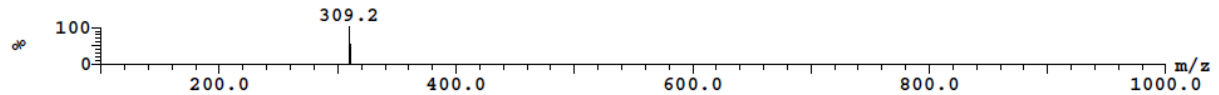

### Figure 6: Compound 8 HPLC/MS/ELSD analysis data

Sample Report (continued):

Sample 5 Vial 2:H,3 ID File YZHAO\_070711\_03 Date 07-Jul-2011 Time 14:04:45 Description

2: UV Detector: TIC (1) 1.777e+2 (1) ELSD Signal (1) 12.052  
 Range: 1.884e+2 Range: 12.089

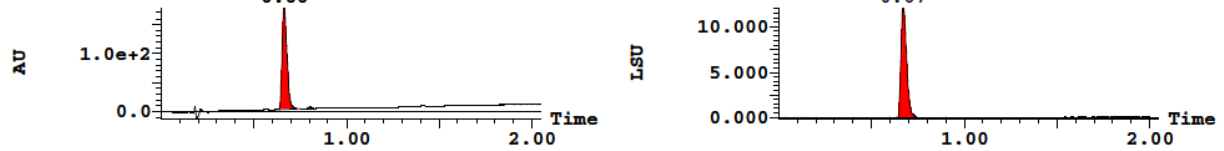

| Peak ID | Compound | Time | Mass Found |
|---------|----------|------|------------|
| 1       |          | 0.66 |            |

1: (Time: 0.66) Combine (737)

2:UV Detector  
2.532 AU

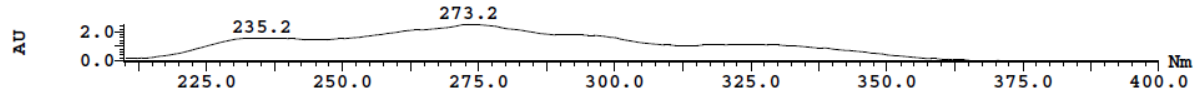

| Peak ID | Compound | Time | Mass Found |
|---------|----------|------|------------|
| 1       |          | 0.66 |            |

1:MS ES+  
5.2e+007

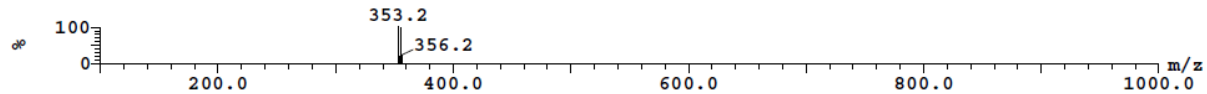

## Figure 7: Compound 11 HPLC/MS/ELSD analysis data

Sample Report (continued):

Sample 7 Vial 2:H,5 ID File YZHAO\_070711\_05 Date 07-Jul-2011 Time 14:10:17 Description

2: UV Detector: TIC (1) 2.711e+2 (1) ELSD Signal (1) 28.437  
 Range: 2.825e+2 Range: 28.473

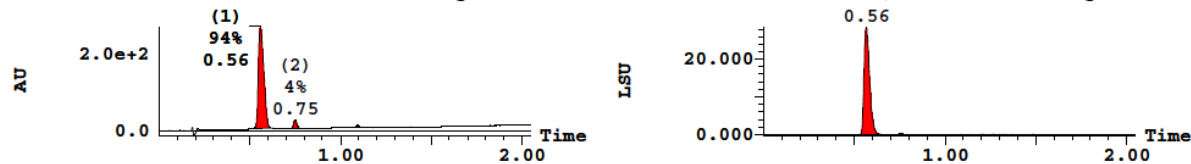

| Peak ID | Compound | Time | Mass Found |
|---------|----------|------|------------|
| 1       |          | 0.56 |            |

1: (Time: 0.56) Combine (612)

2: UV Detector  
3.522 AU

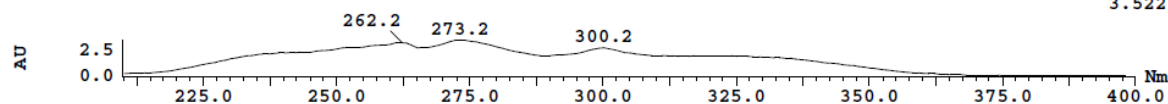

| Peak ID | Compound | Time | Mass Found |
|---------|----------|------|------------|
| 1       |          | 0.56 |            |

1: MS ES+  
8.6e+007

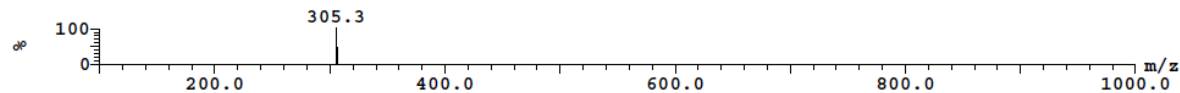

## Figure 8: Compound 12 HPLC/MS/ELSD analysis data

Sample Report (continued):

Sample 8 Vial 2:H,6 ID File YZHAO\_070711\_06 Date 07-Jul-2011 Time 14:13:02 Description

2: UV Detector: TIC (1) 2.026e+2 (1) ELSD Signal (1) 13.438  
 Range: 2.152e+2 Range: 13.482

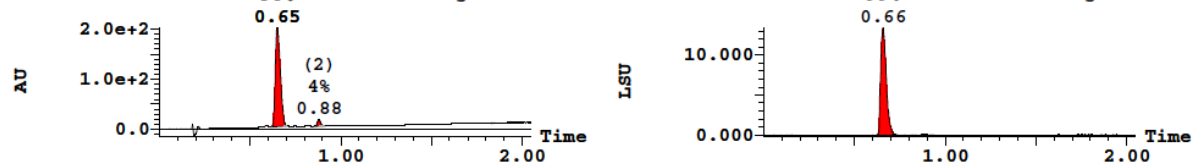

| Peak ID | Compound | Time | Mass Found |
|---------|----------|------|------------|
| 1       |          | 0.65 |            |

1: (Time: 0.65) Combine (721)

2: UV Detector  
3.082 AU

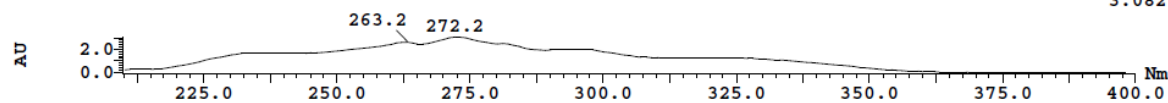

| Peak ID | Compound | Time | Mass Found |
|---------|----------|------|------------|
| 1       |          | 0.65 |            |

1: MS ES+  
7.2e+007

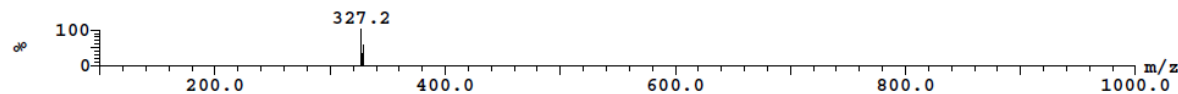

Supplement: NIHMS383141-supplement-01.pdf [file NIHMS383141-supplement-01.pdf]
